1 **Multiple Mechanisms of HIV-1 resistance to PGT135 in Chinese Subtype B' Slow Progressor**

2

3 Shasha Sun<sup>a</sup>, Sen Zou<sup>a</sup>, Yuanyuan Hu<sup>a</sup>, Ying Liu<sup>a</sup>, Li Ren<sup>a</sup>, Yanling Hao<sup>a</sup>, Xintao Hu<sup>a,b</sup>, Yuhua Ruan<sup>a</sup>,  
4 Liying Ma<sup>a</sup>, Yiming Shao<sup>a</sup>, Kunxue Hong<sup>a#</sup>

5

6 <sup>a</sup>State Key Laboratory of Infectious Disease Prevention and Control, National Center for AIDS/STD  
7 Control and Prevention, Chinese Center for Disease Control and Prevention, Beijing 102206, China.

8 <sup>b</sup>Human Retrovirus Pathogenesis Section, Vaccine Branch, Center for Cancer Research, National Cancer  
9 Institute, Frederick, MD, United States.

10

11 Running Head: Multiple Mechanisms of HIV-1 resistance to PGT135

12

13 #Address correspondence to Dr. Kunxue Hong, Email: hongkx@chinaaids.cn.

14

15 Word count: abstract: 212; text: 5229.

16

17

## 18 **ABSTRACT**

19           In our study, we describe a slow progressor CBJC515 from whom we constructed pseudoviruses  
20 expressing autologous Env. We surprisingly found all the pseudoviruses were resistant to PGT135. By  
21 making site-directed mutations and chimeric Env constructs, we found the early 05 strains escaped from  
22 PGT135 by losing the N332 glycan site, while the later 06 and 08 strains may escape with the retention  
23 of key epitopes through the change of V1/V4/C2 region or by N398/N611 glycan, which was selected as  
24 unique N-glycosylation site of CBJC515 compared with CBJC437 whose viruses were also harboring  
25 key epitopes but sensitive to PGT135. These findings provide insights into how HIV-1 can escape from  
26 N332-directed broadly neutralizing antibody (bNAb) responses without changing the epitope itself, and  
27 these ways may be useful to prolong the exposures of bNAb epitopes and contribute to bNAb  
28 development. Furthermore, our chimeric experiments also allowed us to explore the co-evolution and  
29 retention of functionality among regions. We confirmed that the V1V2 region has a wide range of  
30 effectiveness in interfering with the function of envelope protein and the V3 region can promote protein  
31 function recovery and buffer the harmful polymorphisms in the other regions contributing to the Env  
32 antigenic diversity. These results may provide some clues for the design of vaccines against HIV-1  
33 strains.

## 34 **IMPORTANCE**

35           Our findings of mechanisms escaping from PGT135 verified the extensive role of long V1 region  
36 in mediating escape from V3-bNAbs. In addition, we also found multiple additional ways suggested that  
37 extreme variation may be needed by HIV-1 to escape from PGT135 without changing the epitope itself.

38 Although the V3-glycan bNAb responses are among the most promising vaccine targets, as they are  
39 commonly elicited during infection, our findings indicated there may be additional difficulties to be  
40 taken into account in immunogen design, such as the consideration of other regions and some  
41 glycosylation sites affecting the mask of key epitopes, as well as the selection pressure that may be  
42 required by other bNAbs. Our chimeric experiment also highlighted the key role of V3 region in  
43 contributing to the maintenance of Env diversity by buffering deleterious polymorphisms, which may be  
44 helpful for vaccine design.

45 **KEYWORDS** broadly neutralizing monoclonal antibodies (bN-mAbs), V3-glycan bNAb, envelope  
46 pseudoviruses, neutralization resistance, slow progressor

## 47 **Introduction**

48 Inducing antibodies with cross-neutralizing activity is an important indicator for the effectiveness  
49 of HIV-1 vaccine and it remains an unsolved challenge, although broadly neutralizing antibodies  
50 (bNAbs) developed in 10–30% of HIV-1 infected individuals after several years' infection, indicating  
51 there are no insurmountable barriers for introducing bNAbs in humans by Envelope (Env) (1-5). So far,  
52 there is still no immunogen capable of inducing neutralizing antibodies (NAbs) with broad width to  
53 tier-2 viruses (6, 7). In 2019, Bricault CA *et al* (8) modified antigens targeting V2-glycan based on the  
54 neutralizing signatures of V2-glycan bNAbs, and induced greater breadth of tier 2 NAb responses,  
55 indicating the potential usage of researching the resistant mechanisms of HIV-1 to bNAbs in vaccine  
56 design.

57 The glycan supersites of the V3 region on HIV-1 Env form vulnerable targets and are exploited by

58 broadly neutralizing monoclonal antibodies such as PGT121, PGT128, and PGT135(9). The N332  
59 glycan residue at the base of the V3 loop has been demonstrated to provide an important supersite of  
60 vulnerability for extensive antibody-mediated virus neutralization, and is used to aid the design and  
61 development of effective vaccines. In the case of these monoclonal antibodies that target the V3-glycan  
62 supersite, the loss of glycan at position 332 is often associated with resistance(10). However, there are  
63 still quite a lot of circulating strains that harboring this supersite but still resistant to these antibodies(10,  
64 11). Previous studies have speculated that in the presence of N332 glycosylation sites, the longer length  
65 of V1/V2 region was associated with V3-glycan bNAbs resistance (8, 11-14), and van den Kerkhof TL  
66 *et al* (11) observed a statistically significant positive correlation between V1 length and neutralization  
67 resistance to PGT135. However, these speculations still need to be verified. At the same time, because  
68 functionally defined epitopes were distinct from structurally defined epitopes(15), so far, little was  
69 known about the determinants conferring neutralization resistance to these viruses. Researching for the  
70 mechanisms behind this phenomenon may provide insights for modification of vaccine immunogens and  
71 contribute to the design of HIV-1 Env immunogens.

72 Furthermore, the HIV-1 gp120 protein organization alternates between five constant regions and  
73 five variable regions (16) through structural independence, so that the goals of continuous variation and  
74 maintenance of function can be ensured. On the one hand, the more accessible variable regions of the  
75 immune system can freely undergo extensive sequence diversification to counteract the immune  
76 response(17-19); On the other hand, the constant regions are entirely located inside(17, 18), and the  
77 more conserved core regions inside provide a scaffold to stabilize the protein structure(20, 21). In the

78 presence of a wide range of co-evolutionary networks, it is especially a challenge to retain functionality.  
79 Understanding the coevolution networks is also an important issue for vaccine design(22, 23), which  
80 provide insight for the design of antigenic modifications while retaining its functionality.

81 In our study, pseudoviruses expressing the CBJC515 autologous Env were constructed, and the  
82 neutralizing sensitivity of these pseudoviruses to PGT121, VRC01, 12A21, 10E8, 2G12, and PGT135  
83 were tested. Surprisingly we found all of them were resistant to PGT135. Such patient provided us with  
84 a unique opportunity to study this phenomenon. Through site-directed mutation and chimeric experiment,  
85 we found multiple mechanisms of escape from PGT135, including through long V1 region, changes in  
86 V4/C2 region, or through creating 398/611 glycan site, which explored our knowledge especially on  
87 how HIV-1 can escape from PGT135 responses through extreme ways without changing the epitope  
88 itself. Furthermore, chimeric experiments also allow us to explore the co-evolution and function  
89 maintenance among different regions, we verified the V1V2 diversity has broad interference with Env  
90 functionality and the role of V3 region in relieving dramatic decrease in functionality induced by V1V2  
91 or C2, which has been rarely studied(24, 25), and these findings will be useful for vaccine design.

## 92 **Materials and methods**

### 93 **Study subject**

94 The donor CBJC515 and CBJC437 described in this study were selected from a Chinese HIV-1  
95 subtype B' chronically infected cohort, whose plasma exhibit broad cross-neutralizing activity against a  
96 panel of 25 viruses since the first sampling year (26). These patients were infected during commercial

97 plasma donation between 1992 and 1995 and were antiretroviral treatment (ART)-naive. The major  
98 characteristics of CBJC515 were shown in Table 1, and those of CBJC437 were as previously  
99 reported(27). The study was reviewed and approved by the Institutional Review Board of the National  
100 Center for AIDS/STD Control and Prevention, Chinese Center for Disease Control and Prevention. The  
101 subject provided written informed consent before blood and data collection.

### 102 **Single-genome amplification and envelope clones**

103 Viral RNA was extracted from plasma using QIAamp Viral RNA Mini Kit (Qiagen) and cDNA was  
104 immediately synthesized using SuperScript III First-Strand Synthesis System (Invitrogen).  
105 Single-genome amplification (SGA) of the full-length gp160 gene was performed as previously  
106 described (28). Briefly, the synthesized cDNA was continuously diluted and distributed in replicates of  
107 12 to 16 PCRs in the Thermo Grid 96-well plates to identify a dilution where positive wells accounting  
108 for 30% of total PCR reactions. When the SGA criteria of fewer than 30% positive results were met,  
109 most of the wells contain amplicons derived from a single cDNA molecule in the appropriate dilution.

110 The PCR products obtained by SGA were cloned into the commercial directional vector  
111 pcDNA3.1D/V5-His-TOPO according to the manufacturer's instructions (Invitrogen). The correct  
112 pcDNA3.1-Env plasmid used to produce wild type pdsudoviruses were selected by sequencing. First,  
113 transforming the constructed plasmids into E.coli JM109 competent cells (TaKaRa), and then selecting  
114 monoclonal E.coli colonies on ampicillin-resistant LB medium for sequencing. The verified correct  
115 E.coli clones were cultivated and then the plasmids were extracted using E.Z.N.A.® Plasmid Mini Kit

116 (Omega) for pseudovirus production. The mutagenesis and chimeric plasmid described below used to  
117 produce pseudoviruses were selected as the same way.

## 118 **Sequence alignment and analysis**

119 SGA were sequenced on an ABI 3770 Sequencer (Applied Biosciences). The full-length gp160  
120 gene fragments for each product were assembled and edited using Sequencher 4.1 (Gene Codes, Ann  
121 Arbor, MI). All chromatograms were inspected for sites of mixed bases (double peaks), and any  
122 sequence with evidence of double peaks was excluded from further analysis.

123 The Env nucleotide sequences were aligned by Gene Cutter  
124 ([https://www.hiv.lanl.gov/content/sequence/GENE\\_CUTTER/cutter.html](https://www.hiv.lanl.gov/content/sequence/GENE_CUTTER/cutter.html)) using HIV-1 HXB2 as  
125 reference sequence and the amino acid sequences were deduced by Env nucleotide sequences. Potential  
126 N-linked glycosylation sites (PNGS) were identified using N-Glycosite  
127 (<http://www.hiv.lanl.gov/content/sequence/GLYCOSITE/glycosite.html>) at the Los Alamos HIV  
128 database website; The consensus sequence of CBJC515 and CBJC437 were analyzed by online analysis  
129 tool “Consensus Maker” (<https://www.hiv.lanl.gov/content/sequence/CONSENSUS/consensus.html>);  
130 LALIGN tool ([http://www.ch.embnet.org/software/LALIGN\\_form.html](http://www.ch.embnet.org/software/LALIGN_form.html)) was used to calculate sequence  
131 identity and similarity between the 2005 Env consensus sequence and each 2005 functional clones;  
132 Chinese subtype B database set (named “B-Database”) containing a total of 168 sequences were selected  
133 from Los Alamos HIV database (<https://www.hiv.lanl.gov/components/sequence/HIV/search/search.html>)  
134 according to the keywords “china”, “subtype B”, “intact gp120 sequences” and “one sequence/patient”.

## 135 **Generation of site-directed mutagenesis and chimeric clones**

136 Site-directed mutagenesis was performed by standard PCR procedure. Approximately 50 ng plasmid  
137 DNA template, 1  $\mu$ L of 1  $\mu$ M primer F (forward), R (reverse), were added into the PCR mixture  
138 containing 4  $\mu$ L dNTP mixture (2.5 mM), 25  $\mu$ L 2 $\times$ PrimeSTAR GC buffer (TaKaRa), 0.5  $\mu$ L  
139 PrimeSTARWHS DNA polymerase (2.5 U/ $\mu$ L) (TaKaRa) and ddH<sub>2</sub>O, with a total volume of 50  $\mu$ L.  
140 The primer F was designed according to the nucleic acid sequence of 5 amino acid positions before and  
141 after the mutation site, and the primer R was reverse and complement to the primer F. Cycling  
142 conditions for this PCR are 98°C for 1 min, followed by 30 cycles of 98°C for 10 s, 56°C for 20 s (the  
143 annealing temperature can be adjusted according to different primers), and 72°C for 6 min, with a final  
144 extension at 72°C for 10 min. The entire Env gene of each mutant was sequenced to confirm mutation.

145 Chimeric clones were conducted by GeneArt® Seamless Cloning and Assembly Kit (Invitrogen),  
146 which can assemble several linearized DNA fragments into one DNA sequence. The inserted nucleotide  
147 fragments were synthesized (Sangon Biotech). The backbone of Env plasmid to be replaced were  
148 linearly amplified by PCR, and the PCR products were verified on a 0.8% agarose gel and then  
149 subjected to gel extraction using QIAquick Gel Extraction Kit (Qiagen). The two ends of the linear  
150 amplification primers were designed to overlap with synthesized insertion protein sequence with 15bp  
151 bases respectively, so the two parts were able to be seamlessly linked through the assembly kit  
152 (Invitrogen). The integrity of the chimeric plasmids was confirmed by sequencing and restriction  
153 analysis as described above. Finally, the boundaries of regions changed after chimeric were as follows:



154 131-135 for V1 region, 158-196 for V2 region, 131-196 for V1V2 region, 197-295 for C2 region,  
155 296-331 for V3 region, 385-418 for V4 region, and 131-331 for V1-V3 region. The numbers refer to the  
156 amino acids position of HXB2 gp120 protein.

### 157 **Pseudovirus preparation, and titration for neutralization assays**

158 Pseudoviruses were prepared, titrated as previously described(27). Briefly, 293T cells were  
159 cotransfected with pcDNA3.1-Env clone and Env-deficient HIV-1 backbone vector (pSG3 $\Delta$ Env) using  
160 PEI transfection reagent (PolyScience). Pseudovirus-containing supernatant was harvested 48h  
161 post-transfection, and then filtered (0.45 $\mu$ m pore size) and stored at -80°C. The 50% tissue culture  
162 infectious dose (TCID<sub>50</sub>) of a single-thawed aliquot of each pseudovirus batch was determined in  
163 TZM-bl cells.

### 164 **Neutralization assay**

165 Neutralization was measured as a reduction in Luc reporter gene expression after a single round of  
166 virus infection in TZM-bl cells as described previously (26). Briefly, 50  $\mu$ L of pseudotyped viruses  
167 normalized to 4000 TCID<sub>50</sub>/mL was incubated with 100  $\mu$ l serial threefold dilutions of broadly  
168 neutralizing monoclonal antibodies (bN-mAbs) in duplicate for 1 h at 37°C in 96-well flat-bottom  
169 culture plates. The virus-antibody mixture was then used to infect 10,000 TZM-bl cells in the presence  
170 of 30  $\mu$ g/mL DEAE-dextran. One set of the control wells received cells only, while the other set  
171 received pseudovirus plus cells. Infection levels were determined after 48h by measuring the luciferase  
172 activities of cell lysates. After 48 hours of incubation, 150  $\mu$ l of the culture was removed, and 100  $\mu$ l of

173 Ultra-High Sensitivity Luminescence Reporter Gene Assay System (PerkinElmer) was added and  
174 incubated for 2 minutes. luciferase activities of 150  $\mu$ l lysate transferred from each well to a 96-well  
175 black solid plate were measured by a luminometer (PerkinElmer). The 50% inhibitory dose (ID50) was  
176 defined as either the plasma dilution or sample concentration at which relative luminescence units (RLU)  
177 were reduced 50% compared to virus control wells.

### 178 **Neutralizing antibodies used in the study**

179 bN-mAbs PGT135, PGT121, 2G12, 12A21, 10E8, and VRC01 were kindly received from NIH  
180 AIDS Research and Reference Reagent Program.

### 181 **Data availability**

182 Env sequences from CBJC515 and CBJC437 donors have been deposited into GenBank and the  
183 accession numbers were shown in Table 2 and Supplementary Table 1.

## 184 **Results**

### 185 **Sensitivity to neutralization by broadly neutralizing monoclonal antibodies (bN-mAbs)**

186 6, 3, 11 pseudoviruses were successfully constructed from CBJC515 plasma samples at 20050816,  
187 20060418, and 20081118 time points, named 05/06/08 isolates respectively, and we examined the  
188 sensitivity of these isolates to prototypic bNAbs PGT121, VRC01, 12A21, 10E8, 2G12 and PGT135  
189 (Table 2). Almost all 20 clones were sensitive to the CD4 binding site (CD4bs) specific bN-mAb VRC01,  
190 12A21, and membrane proximal external domain (MPER) specific bN-mAb 10E8. As to the bN-mAbs

191 recognizing N332-supersite (9, 29), all clones were resistant to PGT135 but sensitive to PGT121, while  
192 all 05 strains were resistant to 2G12.

### 193 **Lack of 332 glycosylation site leads to resistance to PGT135 in 05 isolates**

194 Since all clones from CBJC515 were resistant to the V3-glycan bNAb PGT135, this aroused our  
195 great interest. PGT135 interacts with glycans at Asn332, Asn386 and Asn392, using long CDR loops H1  
196 and H3 to penetrate the glycan shield to access the gp120 protein surface(9). We first analyzed the 332  
197 position of these strains. As shown in Table 3, the N332 glycan site was generally missing in 05 Env  
198 clones, but all 06/08 clones contained this supersite. In 05 isolates, strain 05-8 lacks 332 N-glycan site  
199 due to the presence of aspartic acid at this position (referring to the relative position on the HXB2 strain,  
200 the same below), while others possess N334 glycan site, which also leads to lack of 332 N-glycan site.  
201 We performed D332N or N334S mutations on 05 isolates, and all of them became sensitive to PGT135  
202 and 2G12 (Table 4). In addition, we checked other epitopes reported in literatures (8, 9, 30) that  
203 associated with PGT135 neutralizing sensitivity(Table 3), and performed R/K389Q, T409E or Y330H  
204 mutation to the corresponding strains, but no changes were found.

205 In our study, PGT135 and 2G12 were completely unable to neutralize the 05 pseudoviruses  
206 containing N334 glycan site, while PGT121 was able to neutralize all of them. Previous studies have  
207 shown that some N332-dependent bNAbs can recognize promiscuous glycans with different ability, and  
208 some can neutralize strains transferred glycosylation site to N334(9, 10). Our observations were  
209 consistent with it.

210 **Chimeric experiment examines effect of different regions on neutralizing sensitivity of 06/08**  
211 **isolates**

212 We further explored the determinants conferring neutralization resistance to 06/08 strains with key  
213 epitopes (Table 3). Sequence analysis showed that 05 isolates had shorter V1 region of 22 amino acids  
214 (aa) with higher similarity, while the 06/08 strains expanded V1 region pronouncedly (22-42 aa long)  
215 and was much longer than HIV-1 subtype B consensus sequence (25 aa) (13) (Fig. 2). By replacing the  
216 V1 region (position 131-157) of 06/08 Env clones to 05-8 (D332N), which was selected as the most  
217 representative strains of 05 clones through sequence harmony (SH) method compared with 05 Env  
218 consensus sequence (Table 5), we assessed whether longer V1 loop was associated with neutralizing  
219 resistance to PGT135 (11, 13).

220 11 V1 chimeras were successfully constructed (Fig. 2 and Table 6). Among them, 6 chimeras were  
221 not able to produce infectious clones (the wild type V1 length varied from 22 to 42 amino acids), 2  
222 chimeric strains 08-2 (05-8 V1), 08-12 (05-8 V1) were still resistant to PGT135 (the original V1 length  
223 was 33, 37 amino acids respectively), and 3 chimeric strains, 08-8 (05-8 V1), 08-11 (05-8 V1) and 08-13  
224 (05-8 V1), became sensitive to PGT135 with the IC<sub>50</sub> of 1.19 ug/ml, 5.8 ug/ml, and 8.3 ug/ml.

225 Since the V1V2 region is a global regulator of neutralizing sensitivity(31-34), previous studies also  
226 shown that the neutralizing ability of some V3-glycan bNAbs were associated with the length of V1V2  
227 region in the presence of N332 glycan site, and the longer the virus in the V1+V2 region, the more  
228 difficult it was to be neutralized (8). Therefore, we also construct 7 V1V2 chimeras by replacing the  
229 V1V2 region of 06/08 strains with that of 05-8 (Table 6). Our neutralizing experiment showed 5 of them

230 lose functionality, and only two chimeras 08-2 (05-8 V1V2) and 08-12 (05-8 V1V2) were functional but  
231 still resistant. Furthermore, we constructed 3 V2 chimeric clones (Table 6), and there was only 1 chimera  
232 was functional and remaining resistant. So, it seems like, among the V1V2 region, V1 loop was the most  
233 important part to confer resistance to these strains.

234 Based on the above results, we further examined whether changes in other regions except for V1  
235 would affect its sensitivity to PGT135 as the virus evolving at subsequent 06/08 time points. Chimeric  
236 envelopes were generated by replacing the C2, V3, V1-V3 or V4 region of 06/08 isolates with the  
237 corresponding region of 05-8 (D332N) (Table 7 and Fig. 1). Neutralization experiment showed all the 6  
238 V3 chimeras did not change sensitivity to PGT135 (Fig. 3). In the 4 C2 chimeras, 3 were functional and  
239 1 was sensitive. 10/12 V1-V3 chimeras were functional with 3 of them became sensitive, while 2/3 V4  
240 chimeras were functional and all the 2 chimeras were sensitive.

#### 241 **N611A and N398A mutation may have Impact on Neutralizing sensitivity to PGT135**

242 To further explore the resistant mechanisms in 06/08 isolates, we selected another Chinese subtype  
243 B' slow progressor CBJC437, whose isolates were also containing key epitopes such as  
244 N332/N386/N392/N295/H330 and were sensitive to PGT135 (Table S1). According to the consensus  
245 sequence alignment, we selected the different sites of the two samples in V3/V4 region (Fig. 4), which  
246 was most likely to influence the neutralizing sensitivity(9), to perform mutations on 3-4 strains of  
247 CBJC515 changing the amino acids to the corresponding signature of CBJC437 isolates. However, no  
248 mutations were found to have effect on the neutralization. Furthermore, we also compared all the  
249 N-glycosylation sites among the two samples, and selected the unique N-glycan site of each sample

250 (since the V1 region has changed a lot, we didn't consider the unique glycosylation sites in the V1  
251 region) (Fig. 4). We only found the N398A mutation in 06-4/08-13 and N611A mutation in 08-9 restored  
252 sensitivity to PGT135 with the IC50 of 7.23 ug/ml, 6.91 ug/ml and 2.64 ug/ml respectively, in a  
253 strain-specific way (Table S2-S3).

#### 254 **Statistical analysis of key glycosylation sites of PGT135 in Chinese HIV-1 subtype B strains**

255 According to previous reports, the neutralization breadth of PGT135 was about 33%, which was  
256 comparable to the CD4bs-class antibody b12, but lower than other N332-dependent antibodies such as  
257 PGT121 and PGT128 (29). This lower neutralization width was reported mainly due to the limited  
258 prevalence of key contact residues, such as Asn332, Asn392 and His330, in circulating strains(9).

259 We downloaded 168 sequences of Chinese subtype B strains from Los Alamos HIV database  
260 (named B-Database), and made statistics on the key neutralizing epitopes of PGT135. H330, N332 and  
261 N392, which are necessary for PGT135 neutralization, were present in 76% (127/168) sequences of  
262 B-Database. As PGT135 can recognize N295 and N386 glycans in a strain-dependent manner(9), we  
263 also calculate the prevalence of H330, N332, N392 and N295 or N386, and the ratio was 66% (111/168)  
264 and 67% (112/168) respectively. At the same time, all the four N-glycan site, N332 N392 N295 and  
265 N386, appeared in 60% (100/168) of the sequences, and the ratio of single glycosylation site at position  
266 332 accounted for 93.5% (157/168). The prevalence of these key sites was significantly higher than the  
267 33% neutralization width of PGT135. It can be speculated that a large part of the Chinese HIV-1 subtype  
268 B strains containing key epitopes of PGT135 may able to escape from it. Therefore, it will be very  
269 meaningful to explore the resistant mechanisms of these strains.

270 **Discussion**

271 The generation of bNAbs responses through vaccination is still an essential question in HIV research.  
272 Knowing the escaping mechanisms in broad cross-neutralizing samples may yield useful information for  
273 vaccine design (14, 35-37). In our research, escape from PGT135 was mediated via multiple pathways.  
274 Except for the absence of N332-supersite, the resistant strains harboring all key epitopes may escape  
275 through changing V1/V4/C2 region, or through N398/N611glycan. Previous study speculated strains  
276 may escape from PGT135 through longer V1 region(11), and in our research, we verified it can indeed  
277 restore the sensitivity in some strains, while the V1V2 or single V2 replacement cannot. Together with  
278 previous study about PGT121 and PGT128(10, 12, 38), our finding highlighted the broad effect of long  
279 V1 region on neutralizing activity to V3-glycan bNAbs which may through blocking access to the  
280 V3-glycan supersite(14). We also found V4 and C2 region may affect its neutralization. Through our  
281 large amount of site-directed mutations, we found it very difficult to restore neutralizing sensitivity by  
282 changing single amino acid. Our observations thus suggested that extreme variations may be needed to  
283 escape from PGT135 in strains with N332-supersite(13).

284 In the CBJC515 donor, over the course of infection, the locations of PNGS were altered. Strains  
285 evolved from 2005 strains without N332 glycosylation site to the isolates with 332 N-glycan gradually  
286 fixing in 2006/2008 timepoint. The usual mode of escape from the V3-carbohydrate class of potent  
287 broadly neutralizing antibodies is via mutation of the N332 glycan(10), so it can be speculated that  
288 samples from time points prior to 2005 may contain V3-glycan bNAbs such as PGT135-like. After the  
289 year 2005, We speculated that the retention of the N332 epitope may be due to selection pressure from

290 strain specific NAb s or other antibody lineages (14, 35) as time went on. In order to escaping from them,  
291 strains produced N332-glycosylation site and adopted these unusual escaping routes. The neutralization  
292 width of CBJC515 fluctuated continuously from 2005 to 2009 timepoint (Table 1) and previously study  
293 which suggesting different lineages of antibody co-exist in this sample(39) supporting our prediction. In  
294 natural infection, bNAbs usually take several years to evolve, suggesting a requirement for prolonged  
295 antigen exposure (36, 40, 41). In CBJC515, the retention of N332 site through extreme escape routes  
296 may help to prolong the exposure of bNAb epitopes, which may assist its maturation as mentioned in  
297 previous reports (14, 35-37), and it was supported by our results of incomplete viral escape in  
298 contemporaneous neutralization (data not shown). The explanation and speculation of the unusual  
299 escaping mode in CBJC515 donor may need to be further explored, such as by plasma epitope mapping  
300 and B-cell sequencing.

301 Genetic diversity and coevolution are essential for HIV-1 to get rid of the host immune response.  
302 Extensive coevolution of structurally and functionally related parts of the protein is the solution for the  
303 virus to conciliate genetic diversity and maintain functionality. For these aspects, there have been few  
304 reports in the past(24, 25), and our chimeric experiment provided materials for the investigation.

305 As the outermost part of the viral particle, gp120 is the virus component most vulnerable to  
306 immune stress, and therefore, may be the most important protein for genetic diversity. Although V1V2  
307 region might preserve the functionality of the protein with only minor structural constraints while they  
308 have evolved to maximize their possibility of sequence diversification, the replacement of variable  
309 region abolishes Env functionality in 5/7 V1V2 chimeras, 6/11 V1 chimeras and 2/3 V2 chimeras (Table



310 6 and Fig. 3b), which indicated the broader validity of V1V2 region in interference with the  
311 functionality of envelope protein (25). In addition, there were 1/3, 1/4 non-functional clones in V4, C2  
312 chimeras, respectively (Table 7 and Fig. 3b). The non-functional clones after the replacement of these  
313 regions reflect the important significance of co-evolution among each region of the strain for function  
314 maintenance.

315 As it has been reported that the replacement of V3 usually has less impact on Env function(25), we  
316 did not find any non-functional clones through chimeric V3 region (Fig. 3a). The higher conservation  
317 level of V3 region may reflect the requirement to maintain the optimal conformation required for the  
318 co-receptor binding site and explain why the replacement of this domain is more tolerant than other  
319 regions(42). When we replace the V1-V3 region (including V1, V2, C2, V3), there were only 2/12  
320 chimeras showed non- functionality (Fig. 3b). This extremely low probability of non-functionality  
321 compared with the single exchange of V1/V2/C2 region, in addition to reflecting the coevolution of  
322 V1-V3 region, it also reflects the role of V3 in promoting function recovery. Taking the 06-4 strain as an  
323 example, chimeric with V1V2 and C2 region all abolished its functionality, while V1-V3 chimeras  
324 restored. A recent study support our finding of the role of V3 region in buffering deleterious effect of  
325 polymorphisms and increasing genetic robustness (24), and this study also pointed out that the defect of  
326 C2 chimera may be blocked after recognizing the co-receptor CCR5 due to interference with the  
327 subsequent conformation of membrane fusion changes.

328 Finally, we deepened the understanding of the pathways that may affect the accessibility of  
329 PGT135 to its epitopes and highlighted the complexity and extremely ways of resistant mechanisms to

330 PGT135 under the condition of harboring key epitopes which verified and supplemented the previous  
331 results. We speculated that these unusual ways may play an auxiliary role in the development of bNAb  
332 and may be related to the maintenance of long-term highly broad cross-neutralizing activity, although it  
333 needs further exploration. The chimeric experiment also verified the importance of coevolution of  
334 structurally and functionally related parts of Env for the virus to conciliate genetic diversity and  
335 maintain functionality, especially the role of V3 region in the retention of functionality. Altogether, our  
336 findings may be helpful for the design of antigenic modifications while retaining its functionality.

### 337 **ACKNOWLEDGMENTS**

338 This work was supported by the grant from the National Natural Science Foundation of China  
339 (81172809, 31411130194), the National Major Project for Infectious Disease Control and Prevention  
340 (2016ZX10001-008, 2018ZX10731-101), the SKLID key project (2019SKLID602) and International  
341 Cooperation Grant from the Ministry of Science and Technology of China (2016YFE0107600). We are  
342 grateful to the CAVD HIV Specimen Cryorepository (HSC) for their contribution of HIV-1  
343 Env-pseudotyped viruses for this study.

### 344 **CONFLICT OF INTEREST**

345 The authors declare that the research was conducted in the absence of any commercial or financial  
346 relationships that could be construed as a potential conflict of interest.

### 347 **AUTHOR CONTRIBUTION STATEMENT**

348 SS, LM, YS and KH conceived and designed the study. SS, SZ, YH, YL, LR and YLH performed  
349 the experiment. SS, YL, XH, YR and KH analyzed the data and edited the manuscript. All authors have  
350 read and approved the final manuscript.

351

## 352 References

- 353 1. Doria-Rose NA, Klein RM, Manion MM, O'Dell S, Phogat A, Chakrabarti B, Hallahan CW,  
354 Migueles SA, Wrammert J, Ahmed R, Nason M, Wyatt RT, Mascola JR, Connors M. 2009.  
355 Frequency and phenotype of human immunodeficiency virus envelope-specific B cells from  
356 patients with broadly cross-neutralizing antibodies. *J Virol* 83:188-99.  
357 <https://doi.org/10.1128/JVI.01583-08>
- 358 2. Euler Z, van den Kerkhof TL, van Gils MJ, Burger JA, Edo-Matas D, Phung P, Wrin T,  
359 Schuitemaker H. 2012. Longitudinal analysis of early HIV-1-specific neutralizing activity in  
360 an elite neutralizer and in five patients who developed cross-reactive neutralizing activity. *J*  
361 *Virol* 86:2045-55. <https://doi.org/10.1128/JVI.06091-11>
- 362 3. Gray ES, Madiga MC, Hermanus T, Moore PL, Wibmer CK, Tumba NL, Werner L, Mlisana K,  
363 Sibeko S, Williamson C, Abdool Karim SS, Morris L, Team CS. 2011. The neutralization  
364 breadth of HIV-1 develops incrementally over four years and is associated with CD4+ T cell  
365 decline and high viral load during acute infection. *J Virol* 85:4828-40.  
366 <https://doi.org/10.1128/JVI.00198-11>
- 367 4. Mikell I, Sather DN, Kalams SA, Altfeld M, Alter G, Stamatatos L. 2011. Characteristics of the  
368 earliest cross-neutralizing antibody response to HIV-1. *PLoS Pathog* 7:e1001251.  
369 <https://doi.org/10.1371/journal.ppat.1001251>
- 370 5. van Gils MJ, Euler Z, Schweighardt B, Wrin T, Schuitemaker H. 2009. Prevalence of  
371 cross-reactive HIV-1-neutralizing activity in HIV-1-infected patients with rapid or slow  
372 disease progression. *AIDS* 23:2405-14. <https://doi.org/10.1097/QAD.0b013e32833243e7>
- 373 6. Sanders RW, Moore JP. 2017. Native-like Env trimers as a platform for HIV-1 vaccine design.  
374 *Immunol Rev* 275:161-182. <https://doi.org/10.1111/imr.12481>
- 375 7. Pancera M, Changela A, Kwong PD. 2017. How HIV-1 entry mechanism and broadly  
376 neutralizing antibodies guide structure-based vaccine design. *Curr Opin HIV AIDS*  
377 12:229-240. <https://doi.org/10.1097/COH.0000000000000360>
- 378 8. Bricault CA, Yusim K, Seaman MS, Yoon H, Theiler J, Giorgi EE, Wagh K, Theiler M, Hraber P,  
379 Macke JP, Kreider EF, Learn GH, Hahn BH, Scheid JF, Kovacs JM, Shields JL, Lavine CL,  
380 Ghantous F, Rist M, Bayne MG, Neubauer GH, McMahan K, Peng H, Cheneau C, Jones JJ, Zeng  
381 J, Ochsenbauer C, Nkolola JP, Stephenson KE, Chen B, Gnanakaran S, Bonsignori M, Williams  
382 LD, Haynes BF, Doria-Rose N, Mascola JR, Montefiori DC, Barouch DH, Korber B. 2019. HIV-1  
383 Neutralizing Antibody Signatures and Application to Epitope-Targeted Vaccine Design. *Cell*  
384 *Host Microbe* 25:59-72.e8. <https://doi.org/10.1016/j.chom.2019.07.016>
- 385 9. Kong L, Lee JH, Doores KJ, Murin CD, Julien JP, McBride R, Liu Y, Marozsan A, Cupo A, Klasse  
386 PJ. 2013. Supersite of immune vulnerability on the glycosylated face of HIV-1 envelope  
387 glycoprotein gp120. *Nature Structural & Molecular Biology* 20:796-803.
- 388 10. Sok D, Doores KJ, Briney B, Le KM, Saye-Francisco KL, Ramos A, Kulp DW, Julien JP, Menis S,  
389 Wickramasinghe L, Seaman MS, Schief WR, Wilson IA, Poignard P, Burton DR. 2014.

- 390 Promiscuous glycan site recognition by antibodies to the high-mannose patch of gp120  
391 broadens neutralization of HIV. *Sci Transl Med* 6:236ra63.  
392 <https://doi.org/10.1126/scitranslmed.3008104>
- 393 11. van den Kerkhof TL, de Taeye SW, Boeser-Nunnink BD, Burton DR, Kootstra NA,  
394 Schuitemaker H, Sanders RW, van Gils MJ. 2016. HIV-1 escapes from N332-directed  
395 antibody neutralization in an elite neutralizer by envelope glycoprotein elongation and  
396 introduction of unusual disulfide bonds. *Retrovirology* 13:48.  
397 <https://doi.org/10.1186/s12977-016-0279-4>
- 398 12. Deshpande S, Patil S, Kumar R, Hermanus T, Murugavel KG, Srikrishnan AK, Solomon S,  
399 Morris L, Bhattacharya J. 2016. HIV-1 clade C escapes broadly neutralizing autologous  
400 antibodies with N332 glycan specificity by distinct mechanisms. *Retrovirology* 13:60.  
401 <https://doi.org/10.1186/s12977-016-0297-2>
- 402 13. Silver ZA, Dickinson GM, Seaman MS, Desrosiers RC. 2019. A Highly Unusual V1 Region of  
403 Env in an Elite Controller of HIV Infection. *J Virol* 93:e00094-19.  
404 <https://doi.org/10.1128/JVI.00094-19>
- 405 14. Anthony C, York T, Bekker V, Matten D, Selhorst P, Ferreria RC, Garrett NJ, Karim SSA, Morris  
406 L, Wood NT, Moore PL, Williamson C. 2017. Cooperation between Strain-Specific and  
407 Broadly Neutralizing Responses Limited Viral Escape and Prolonged the Exposure of the  
408 Broadly Neutralizing Epitope. *J Virol* 91:e00828-17. <https://doi.org/10.1128/JVI.00828-17>
- 409 15. Dingens AS, Arenz D, Weight H, Overbaugh J, Bloom JD. 2019. An Antigenic Atlas of HIV-1  
410 Escape from Broadly Neutralizing Antibodies Distinguishes Functional and Structural  
411 Epitopes. *Immunity* 50:520-532 e3. <https://doi.org/10.1016/j.immuni.2018.12.017>
- 412 16. Starcich BR, Hahn BH, Shaw GM, McNeely PD, Modrow S, Wolf H, Parks ES, Parks WP,  
413 Josephs SF, Gallo RC, et al. 1986. Identification and characterization of conserved and  
414 variable regions in the envelope gene of HTLV-III/LAV, the retrovirus of AIDS. *Cell*  
415 45:637-48. [https://doi.org/10.1016/0092-8674\(86\)90778-6](https://doi.org/10.1016/0092-8674(86)90778-6)
- 416 17. Wei X, Decker JM, Wang S, Hui H, Kappes JC, Wu X, Salazar-Gonzalez JF, Salazar MG, Kilby JM,  
417 Saag MS, Komarova NL, Nowak MA, Hahn BH, Kwong PD, Shaw GM. 2003. Antibody  
418 neutralization and escape by HIV-1. *Nature* 422:307-12.  
419 <https://doi.org/10.1038/nature01470>
- 420 18. Mascola JR, Montefiori DC. 2010. The role of antibodies in HIV vaccines. *Annu Rev Immunol*  
421 28:413-44. <https://doi.org/10.1146/annurev-immunol-030409-101256>
- 422 19. Reitter JN, Means RE, Desrosiers RC. 1998. A role for carbohydrates in immune evasion in  
423 AIDS. *Nat Med* 4:679-84. <https://doi.org/10.1038/nm0698-679>
- 424 20. Chen B, Vogan EM, Gong H, Skehel JJ, Wiley DC, Harrison SC. 2005. Structure of an  
425 unliganded simian immunodeficiency virus gp120 core. *Nature* 433:834-41.  
426 <https://doi.org/10.1038/nature03327>
- 427 21. McLellan JS, Pancera M, Carrico C, Gorman J, Julien JP, Khayat R, Louder R, Pejchal R, Sastry  
428 M, Dai K, O'Dell S, Patel N, Shahzad-ul-Hussan S, Yang Y, Zhang B, Zhou T, Zhu J, Boyington JC,

- 429 Chuang GY, Diwanji D, Georgiev I, Kwon YD, Lee D, Louder MK, Moquin S, Schmidt SD, Yang  
430 ZY, Bonsignori M, Crump JA, Kapiga SH, Sam NE, Haynes BF, Burton DR, Koff WC, Walker LM,  
431 Phogat S, Wyatt R, Orwenyo J, Wang LX, Arthos J, Bewley CA, Mascola JR, Nabel GJ, Schief  
432 WR, Ward AB, Wilson IA, Kwong PD. 2011. Structure of HIV-1 gp120 V1/V2 domain with  
433 broadly neutralizing antibody PG9. *Nature* 480:336-43.  
434 <https://doi.org/10.1038/nature10696>
- 435 22. Kwon YD, Pancera M, Acharya P, Georgiev IS, Crooks ET, Gorman J, Joyce MG, Guttman M, Ma  
436 X, Narpala S, Soto C, Terry DS, Yang Y, Zhou T, Ahlsen G, Bailer RT, Chambers M, Chuang GY,  
437 Doria-Rose NA, Druz A, Hallen MA, Harned A, Kirys T, Louder MK, O'Dell S, Ofek G, Osawa K,  
438 Prabhakaran M, Sastry M, Stewart-Jones GB, Stuckey J, Thomas PV, Tittley T, Williams C,  
439 Zhang B, Zhao H, Zhou Z, Donald BR, Lee LK, Zolla-Pazner S, Baxa U, Schon A, Freire E,  
440 Shapiro L, Lee KK, Arthos J, Munro JB, Blanchard SC, Mothes W, Binley JM, et al. 2015.  
441 Crystal structure, conformational fixation and entry-related interactions of mature  
442 ligand-free HIV-1 Env. *Nat Struct Mol Biol* 22:522-31. <https://doi.org/10.1038/nsmb.3051>
- 443 23. Mann JK, Ndung'u T. 2015. HIV-1 vaccine immunogen design strategies. *Viol J* 12:3.  
444 <https://doi.org/10.1186/s12985-014-0221-0>
- 445 24. Gasser R, Hamoudi M, Pellicciotta M, Zhou Z, Visdeloup C, Colin P, Braibant M, Lagane B,  
446 Negroni M. 2016. Buffering deleterious polymorphisms in highly constrained parts of HIV-1  
447 envelope by flexible regions. *Retrovirology* 13:50.  
448 <https://doi.org/10.1186/s12977-016-0285-6>
- 449 25. Hamoudi M, Simon-Lorier E, Gasser R, Negroni M. 2013. Genetic diversity of the highly  
450 variable V1 region interferes with Human Immunodeficiency Virus type 1 envelope  
451 functionality. *Retrovirology* 10:114. <https://doi.org/10.1186/1742-4690-10-114>
- 452 26. Hu X, Hong K, Zhao C, Zheng Y, Ma L, Ruan Y, Gao H, Greene K, Sarzotti-Kelsoe M, Montefiori  
453 DC, Shao Y. 2012. Profiles of neutralizing antibody response in chronically human  
454 immunodeficiency virus type 1 clade B'-infected former plasma donors from China naive to  
455 antiretroviral therapy. *J Gen Virol* 93:2267-78. <https://doi.org/10.1099/vir.0.043802-0>
- 456 27. Zhang D, Zou S, Hu Y, Hou J, Hu X, Ren L, Ma L, He X, Shao Y, Hong K. 2019. Characteristics of  
457 Envelope Genes in a Chinese Chronically HIV-1 Infected Patient With Broadly Neutralizing  
458 Activity. *Front Microbiol* 10:1096. <https://doi.org/10.3389/fmicb.2019.01096>
- 459 28. Wu X, Wang C, O'Dell S, Li Y, Keele BF, Yang Z, Imamichi H, Doria-Rose N, Hoxie JA, Connors  
460 M, Shaw GM, Wyatt RT, Mascola JR. 2012. Selection pressure on HIV-1 envelope by broadly  
461 neutralizing antibodies to the conserved CD4-binding site. *J Virol* 86:5844-56.  
462 <https://doi.org/10.1128/JVI.07139-11>
- 463 29. Walker LM, Huber M, Doores KJ, Falkowska E, Pejchal R, Julien JP, Wang SK, Ramos A,  
464 Chan-Hui PY, Moyle M, Mitcham JL, Hammond PW, Olsen OA, Phung P, Fling S, Wong CH,  
465 Phogat S, Wrin T, Simek MD, Protocol GPI, Koff WC, Wilson IA, Burton DR, Poignard P. 2011.  
466 Broad neutralization coverage of HIV by multiple highly potent antibodies. *Nature*  
467 477:466-70. <https://doi.org/10.1038/nature10373>



- 468 30. Ferguson AL, Falkowska E, Walker LM, Seaman MS, Burton DR, Chakraborty AK. 2013.  
469 Computational prediction of broadly neutralizing HIV-1 antibody epitopes from  
470 neutralization activity data. *PLoS One* 8:e80562.  
471 <https://doi.org/10.1371/journal.pone.0080562>
- 472 31. Pinter A, Honnen WJ, He Y, Gorny MK, Zolla-Pazner S, Kayman SC. 2004. The V1/V2 domain  
473 of gp120 is a global regulator of the sensitivity of primary human immunodeficiency virus  
474 type 1 isolates to neutralization by antibodies commonly induced upon infection. *J Virol*  
475 78:5205-15. <https://doi.org/10.1128/jvi.78.10.5205-5215.2004>
- 476 32. Liao HX, Bonsignori M, Alam SM, McLellan JS, Tomaras GD, Moody MA, Kozink DM, Hwang  
477 KK, Chen X, Tsao CY, Liu P, Lu X, Parks RJ, Montefiori DC, Ferrari G, Pollara J, Rao M,  
478 Peachman KK, Santra S, Letvin NL, Karasavvas N, Yang ZY, Dai K, Pancera M, Gorman J,  
479 Wiehe K, Nicely NI, Rerks-Ngarm S, Nitayaphan S, Kaewkungwal J, Pitisuttithum P, Tartaglia  
480 J, Sinangil F, Kim JH, Michael NL, Kepler TB, Kwong PD, Mascola JR, Nabel GJ, Pinter A,  
481 Zolla-Pazner S, Haynes BF. 2013. Vaccine induction of antibodies against a structurally  
482 heterogeneous site of immune pressure within HIV-1 envelope protein variable regions 1  
483 and 2. *Immunity* 38:176-86. <https://doi.org/10.1016/j.immuni.2012.11.011>
- 484 33. Rerks-Ngarm S, Pitisuttithum P, Nitayaphan S, Kaewkungwal J, Chiu J, Paris R, Prensri N,  
485 Namwat C, de Souza M, Adams E, Benenson M, Gurunathan S, Tartaglia J, McNeil JG, Francis  
486 DP, Stablein D, Birx DL, Chunsuttiwat S, Khamboonruang C, Thongcharoen P, Robb ML,  
487 Michael NL, Kunasol P, Kim JH, Investigators M-T. 2009. Vaccination with ALVAC and  
488 AIDSVAX to prevent HIV-1 infection in Thailand. *N Engl J Med* 361:2209-20.  
489 <https://doi.org/10.1056/NEJMoa0908492>
- 490 34. Rolland M, Edlefsen PT, Larsen BB, Tovanabuttra S, Sanders-Buell E, Hertz T, deCamp AC,  
491 Carrico C, Menis S, Margaret CA, Ahmed H, Juraska M, Chen L, Konopa P, Nariya S, Stoddard  
492 JN, Wong K, Zhao H, Deng W, Maust BS, Bose M, Howell S, Bates A, Lazzaro M, O'Sullivan A,  
493 Lei E, Bradfield A, Ibitamuno G, Assawadarachai V, O'Connell RJ, deSouza MS, Nitayaphan S,  
494 Rerks-Ngarm S, Robb ML, McLellan JS, Georgiev I, Kwong PD, Carlson JM, Michael NL, Schief  
495 WR, Gilbert PB, Mullins JI, Kim JH. 2012. Increased HIV-1 vaccine efficacy against viruses  
496 with genetic signatures in Env V2. *Nature* 490:417-20.  
497 <https://doi.org/10.1038/nature11519>
- 498 35. Gao F, Bonsignori M, Liao HX, Kumar A, Xia SM, Lu X, Cai F, Hwang KK, Song H, Zhou T, Lynch  
499 RM, Alam SM, Moody MA, Ferrari G, Berrong M, Kelsoe G, Shaw GM, Hahn BH, Montefiori DC,  
500 Kamanga G, Cohen MS, Hraber P, Kwong PD, Korber BT, Mascola JR, Kepler TB, Haynes BF.  
501 2014. Cooperation of B cell lineages in induction of HIV-1-broadly neutralizing antibodies.  
502 *Cell* 158:481-91. <https://doi.org/10.1016/j.cell.2014.06.022>
- 503 36. Bonsignori M, Zhou T, Sheng Z, Chen L, Gao F, Joyce MG, Ozorowski G, Chuang GY, Schramm  
504 CA, Wiehe K, Alam SM, Bradley T, Gladden MA, Hwang KK, Iyengar S, Kumar A, Lu X, Luo K,  
505 Mangiapani MC, Parks RJ, Song H, Acharya P, Bailer RT, Cao A, Druz A, Georgiev IS, Kwon YD,  
506 Louder MK, Zhang B, Zheng A, Hill BJ, Kong R, Soto C, Program NCS, Mullikin JC, Douek DC,

- 507 Montefiori DC, Moody MA, Shaw GM, Hahn BH, Kelsoe G, Hraber PT, Korber BT, Boyd SD,  
508 Fire AZ, Kepler TB, Shapiro L, Ward AB, Mascola JR, Liao HX, et al. 2016. Maturation  
509 Pathway from Germline to Broad HIV-1 Neutralizer of a CD4-Mimic Antibody. *Cell*  
510 165:449-63. <https://doi.org/10.1016/j.cell.2016.02.022>
- 511 37. Moore PL, Sheward D, Nonyane M, Ranchobe N, Hermanus T, Gray ES, Abdool Karim SS,  
512 Williamson C, Morris L. 2013. Multiple pathways of escape from HIV broadly  
513 cross-neutralizing V2-dependent antibodies. *J Virol* 87:4882-94.  
514 <https://doi.org/10.1128/JVI.03424-12>
- 515 38. Goo L, Jalalian-Lechak Z, Richardson BA, Overbaugh J. 2012. A combination of broadly  
516 neutralizing HIV-1 monoclonal antibodies targeting distinct epitopes effectively neutralizes  
517 variants found in early infection. *J Virol* 86:10857-61.  
518 <https://doi.org/10.1128/JVI.01414-12>
- 519 39. Li D, Wang Z, Ren L, Zhang J, Feng G, Hong K, Hao Y, Qi Z, Liang H, Shao Y. 2016. Study of  
520 antibody repertoires to the CD4 binding site of gp120 of a Chinese HIV-1-infected elite  
521 neutralizer, using 454 sequencing and single-cell sorting. *Arch Virol* 161:789-99.  
522 <https://doi.org/10.1007/s00705-015-2710-x>
- 523 40. Xiao X, Chen W, Feng Y, Dimitrov DS. 2009. Maturation Pathways of Cross-Reactive HIV-1  
524 Neutralizing Antibodies. *Viruses* 1:802-17. <https://doi.org/10.3390/v1030802>
- 525 41. Klein F, Diskin R, Scheid JF, Gaebler C, Mouquet H, Georgiev IS, Pancera M, Zhou T, Incesu RB,  
526 Fu BZ, Gnanapragasam PN, Oliveira TY, Seaman MS, Kwong PD, Bjorkman PJ, Nussenzweig  
527 MC. 2013. Somatic mutations of the immunoglobulin framework are generally required for  
528 broad and potent HIV-1 neutralization. *Cell* 153:126-38.  
529 <https://doi.org/10.1016/j.cell.2013.03.018>
- 530 42. Zolla-Pazner S, Cardozo T. 2010. Structure-function relationships of HIV-1 envelope  
531 sequence-variable regions refocus vaccine design. *Nat Rev Immunol* 10:527-35.  
532 <https://doi.org/10.1038/nri2801>



534 **Legends**

535 **FIG 1** Schematic representation of the chimeric HIV-1 envelopes used in this study. The C1-C5  
536 structure of the 05-8 envelope gene is given at the top, with the constant and variable regions of the  
537 gp120 region in green and yellow, respectively. In the 06/08 wildtype receiver protein, the backbone of  
538 constant and variable region is shown in dark blue and light blue, respectively.

539 **FIG 2** The alignment of V1 region. CON B representing the HIV-1 subtype B consensus sequence was  
540 from reference(13). Sequence position corresponding to reference strain HXB2 is 131-157. The nucleic  
541 acid with gray, dark gray, and black background represents common amino acid sequences. Gaps in the  
542 amino acid sequence are shown with a dash (-). The rightmost number shows the length of V1 region.  
543 The names of sensitive chimeras are in red background, resistant chimeras are in yellow background,  
544 and non-functional chimeras are in gray background.

545 **FIG 3** V3 alignment (a) and ratio of non-functional chimeras when chimeric with V1, V2, V1V2, C2,  
546 V3, V1-V3, and V4 region (b). The nucleic acid with Gray, dark gray, and black background represent  
547 common amino acid sequences. Resistant chimeras are in yellow background.

548 **FIG 4** Alignment of the consensus sequence between CBJC515 and CBJC437. Numbers with Asterisks  
549 represent potential glycosylation sites; Blue fonts and red fonts represent CBJC515-specific and  
550 CBJC437-specific glycosylation sites (excluding V1 region) respectively by N-Glycosite analysis;  
551 Yellow fonts represent different non-glycosylation sites among V3/V4 regions between CBJC515 and  
552 CBJC437 consensus sequence. The arrows and the above numbers represent the boundaries of each  
553 variable and constant region.

554

555 **TABLE 1** Major characteristics of CBJC515 donor

| Sample date | No.of CD4+ T   | No.of viral RNA | Geometric mean | No.of functional | Breath |
|-------------|----------------|-----------------|----------------|------------------|--------|
|             | cells/ $\mu$ L | copies/mL       | ID50 titres    | clones           |        |
| 20050816    | 528            | 1.97E+04        | -              | 6                | -      |
| 20051101    | 530            | 6.94E+03        | 61.7           | -                | 77.3%  |
| 20060418    | 536            | 1.55E+04        | 161.6          | 3                | 90.9%  |
| 20061123    | 476            | 2.90E+04        | 203.0          | -                | 95.5%  |
| 20070424    | 543            | 6.69E+03        | 106.0          | -                | 81.8%  |
| 20080415    | 459            | 2.22E+04        | -              | -                | -      |
| 20081118    | 321            | 1.25E+05        | 94.1           | 11               | 86.4%  |
| 20090519    | 268            | 8.56E+04        | 164.8          | -                | 95.5%  |

556 “-” indicates no data were obtained.

557

558 **TABLE 2** Neutralization sensitivity of CBJC515 pseudoviruses to representative broadly neutralizing  
559 monoclonal antibodies (bN-mAbs)

| Functional clones | Accession number | IC50( $\mu$ g/mL) |       |       |      |      |        |
|-------------------|------------------|-------------------|-------|-------|------|------|--------|
|                   |                  | PGT121            | VRC01 | 12A21 | 10E8 | 2G12 | PGT135 |
| 05-3              | MF591587         | 0.73              | 0.06  | 15.21 | 0.96 | >10  | >10    |
| 05-4              | MF591591         | 0.79              | 0.15  | 12.12 | 0.22 | >10  | >10    |
| 05-5              | MF591593         | 1.27              | 0.11  | 0.07  | 0.33 | >10  | >10    |
| 05-6              | MF591594         | 1.82              | 0.09  | 0.05  | 0.31 | >10  | >10    |
| 05-8              | MF591596         | 0.75              | 0.077 | >10   | 0.26 | >10  | >10    |
| 05-9              | MF591597         | 1.77              | 0.24  | 17.39 | 0.42 | >10  | >10    |
| 06-1              | MF591619         | 1.19              | 4.76  | 4.09  | 3.05 | 0.62 | >10    |
| 06-2              | MF591620         | 5.79              | 2.11  | 1.91  | 0.68 | 0.89 | >10    |

|       |          |      |      |      |      |      |     |
|-------|----------|------|------|------|------|------|-----|
| 06-4  | MF591622 | 0.45 | 1.88 | 1.12 | 1.24 | 0.47 | >10 |
| 08-1  | MF591660 | 0.2  | 3.54 | 2.63 | 0.86 | 0.67 | >10 |
| 08-2  | MF591661 | 0.8  | 4.18 | 3.11 | 2.17 | 0.77 | >10 |
| 08-4  | MF591663 | 6.67 | 6.24 | 0.36 | 0.92 | 3.37 | >10 |
| 08-6  | MF591665 | 0.7  | 3.5  | 3.12 | 0.14 | 0.71 | >10 |
| 08-7  | MF591666 | 2.1  | 0.08 | 5.29 | 0.31 | >10  | >10 |
| 08-8  | MF591667 | 0.31 | 4.76 | 0.44 | 0.43 | 5.42 | >10 |
| 08-9  | MF591669 | 0.47 | 3.09 | 1.99 | 0.88 | 0.58 | >10 |
| 08-10 | MF591670 | 1.11 | 3.81 | 0.1  | 0.28 | 0.91 | >10 |
| 08-11 | MF591671 | 0.48 | 4.25 | 2.32 | 0.5  | 0.46 | >10 |
| 08-12 | MF591672 | 2.97 | 2.31 | 1.27 | 0.73 | 2.37 | >10 |
| 08-13 | MF591673 | 0.19 | 2.84 | 0.68 | 0.7  | 0.5  | >10 |

560 “>10” means couldn’t be neutralized by PGT135.

561

562 **TABLE 3** The condition of epitopes for PGT135 in 2005, 2006 and 2008 functional Env clones

| Env clones | N-glycan site |     |     |     | Q389 | E409 | H330 |
|------------|---------------|-----|-----|-----|------|------|------|
|            | 332           | 295 | 386 | 392 |      |      |      |
| 05-3       | -             | +   | +   | +   | R    | T    | .    |
| 05-4       | -             | +   | +   | +   | R    | T    | .    |
| 05-5       | -             | +   | +   | +   | R    | T    | .    |
| 05-6       | -             | +   | +   | +   | R    | T    | .    |
| 05-8       | -             | +   | +   | +   | R    | T    | .    |
| 05-9       | -             | +   | +   | +   | R    | T    | .    |
| 06-1       | +             | +   | +   | +   | K    | T    | .    |
| 06-2       | +             | +   | +   | +   | K    | T    | .    |

|       |   |   |   |   |   |   |   |
|-------|---|---|---|---|---|---|---|
| 06-4  | + | + | + | + | K | T | . |
| 08-1  | + | + | + | + | K | T | . |
| 08-2  | + | + | + | + | K | T | . |
| 08-4  | + | + | + | + | K | T | Y |
| 08-6  | + | + | + | + | K | T | . |
| 08-7  | + | + | + | + | R | T | . |
| 08-8  | + | + | + | + | K | T | Y |
| 08-9  | + | + | + | + | K | T | . |
| 08-10 | + | + | + | + | K | T | Y |
| 08-11 | + | + | + | + | K | T | . |
| 08-12 | + | + | + | + | K | T | Y |
| 08-13 | + | + | + | + | K | T | Y |

563 “+” indicates that the sequence has a potential N-glycosylation site on the position shown on the top; “-” indicates  
 564 no N-glycosylation site on the corresponding site; “.” indicates the amino acid was consistent with epitope on the  
 565 top.

566

567 **TABLE 4** The neutralizing sensitivity of mutations to PGT135

| Mutant clones | IC50(ug/mL) |      |
|---------------|-------------|------|
|               | PGT135      | 2G12 |
| 05-8 (D332N)  | 0.57        | 1.76 |
| 05-3 (N334S)  | 6.68        | 0.82 |
| 05-4 (N334S)  | 1.54        | 1.89 |
| 05-5 (N334S)  | 0.66        | 0.97 |
| 05-6 (N334S)  | 5.05        | >10  |

05-9 (N334S)

0.90

1.66

568 “>10” means couldn’t be neutralized by PGT135.

569

570 **TABLE 5** Similarity of amino acid sequence of consensus 05 functional Env with other 05 functional  
571 Envs

| 05 Envs | % Identity <sup>a</sup> | % Similarity <sup>b</sup> |
|---------|-------------------------|---------------------------|
| Con 05  | 100.0                   | 100.0                     |
| 05-3    | 98.0                    | 99.5                      |
| 05-8    | 99.5                    | 99.6                      |
| 05-4    | 99.3                    | 99.5                      |
| 05-5    | 99.3                    | 99.5                      |
| 05-6    | 98.5                    | 99.3                      |
| 05-9    | 98.7                    | 99.5                      |

572 <sup>a</sup>“% identity” refers to the degree of correlation between two un-gapped sequences and indicates that the amino  
573 acid at the particular position is an exact match. <sup>b</sup>“% similarity” refers to the degree of resemblance between two  
574 sequences and indicates that the amino acids at a particular position have some properties in common (e.g., charge  
575 or hydrophobicity) but are not identical.

576

577 **TABLE 6** Neutralizing sensitivity of V1/V1V2/V2 chimeras to PGT135

| 06、08 Chimeric clones | IC50(ug/ml) |
|-----------------------|-------------|
| V1 chimera            |             |
| 06-2(05-8 V1)         | -           |
| 06-4(05-8 V1)         | -           |
| 08-1(05-8 V1)         | -           |

|                  |      |
|------------------|------|
| 08-2(05-8 V1)    | >10  |
| 08-7(05-8 V1)    | -    |
| 08-8(05-8 V1)    | 1.19 |
| 08-9(05-8 V1)    | -    |
| 08-10(05-8 V1)   | -    |
| 08-11(05-8 V1)   | 5.8  |
| 08-12(05-8 V1)   | >10  |
| 08-13(05-8 V1)   | 8.3  |
| V1V2 chimera     |      |
| 08-1(05-8 V1V2)  | -    |
| 08-2(05-8 V1V2)  | >10  |
| 08-8(05-8 V1V2)  | -    |
| 06-4(05-8 V1V2)  | -    |
| 08-10(05-8 V1V2) | -    |
| 08-11(05-8 V1V2) | -    |
| 08-12(05-8 V1V2) | >10  |
| V2 chimera       |      |
| 08-8(05-8 V2)    | -    |
| 08-10(05-8 V2)   | -    |
| 08-12(05-8 V2)   | >10  |

578 “-” indicates non-functional chimera; “>10” means couldn’t be neutralized by PGT135.

579

580 **TABLE 7** Neutralizing sensitivity of C2/V4/V1-V3 chimeras to PGT135

| 06、08 Chimeric clones | IC50(ug/ml) |
|-----------------------|-------------|
| C2 Chimera            |             |

---

|                |     |
|----------------|-----|
| 06-4(05-8 C2)  | -   |
| 08-4(05-8 C2)  | 8.3 |
| 08-10(05-8 C2) | >10 |
| 08-12(05-8 C2) | >10 |

---

|               |      |
|---------------|------|
| V4 Chimera    |      |
| 06-1(05-8 V4) | 2.74 |
| 08-2(05-8 V4) | -    |
| 08-6(05-8 V4) | 0.26 |

---

|                   |      |
|-------------------|------|
| V1-V3 Chimera     |      |
| 06-1(05-8 V1-V3)  | >10  |
| 06-4(05-8 V1-V3)  | >10  |
| 08-1(05-8 V1-V3)  | -    |
| 08-2(05-8 V1-V3)  | >10  |
| 08-4(05-8 V1-V3)  | >10  |
| 08-6(05-8 V1-V3)  | >10  |
| 08-8(05-8 V1-V3)  | 4.77 |
| 08-9(05-8 V1-V3)  | >10  |
| 08-10(05-8 V1-V3) | 2.6  |
| 08-11(05-8 V1-V3) | -    |
| 08-12(05-8 V1-V3) | 1.18 |
| 08-13(05-8 V1-V3) | >10  |

---

581 “-” indicates non-functional chimera; “>10” means couldn’t be neutralized by PGT135.

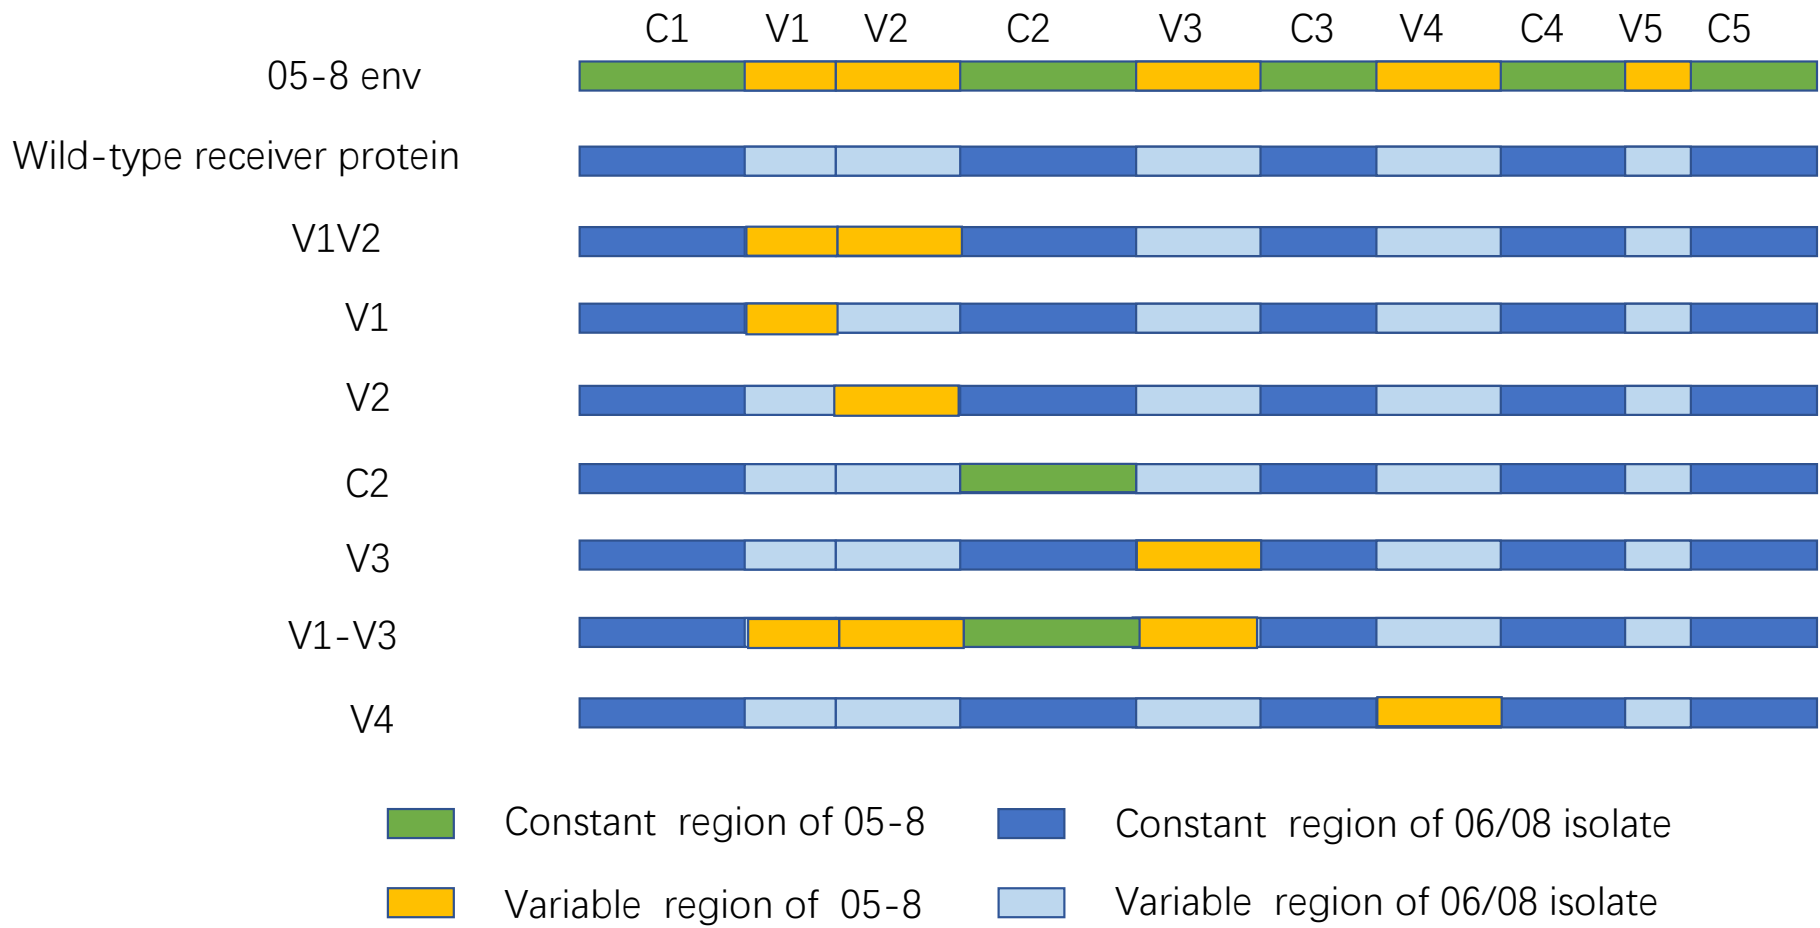



|       | 131                                  |                     | 157     |    |
|-------|--------------------------------------|---------------------|---------|----|
| HXB2  | CTDLKNDTNTNS                         | -----SSGRMIMEK      | GGEIKNC | 27 |
| CON B | CTDLMNATNTNT                         | -----TI--IYRWR      | GGEIKNC | 25 |
| 05-8  | CADLRNTTNN                           | -----SSTTEG         | GGEIKNC | 22 |
| 05-3  | CADLRNTTNT                           | -----SITTEG         | GGEIKNC | 22 |
| 05-4  | CADLRNTTNT                           | -----SITTEG         | GGEIKNC | 22 |
| 05-5  | CADLRNTTNT                           | -----SITTEG         | GGEIKNC | 22 |
| 05-6  | CADLRNTTNT                           | -----SITTEG         | GGEIKNC | 22 |
| 05-9  | CADLRNTTNT                           | -----SITTEG         | GGEIKNC | 22 |
| 06-1  | CTNLNTTDNNS                          | -----NISSPTEG       | GGEIKNC | 25 |
| 06-2  | CTDWRNTDNTSGNNTNSTSGNSTDSAGGNISSPTEG | GGEIKNC             | 42      |    |
| 06-4  | CTNLNTTDNNS                          | -----NISSPTEG       | GGEIKNC | 25 |
| 08-1  | CTDWKNTNNSNNNTS                      | -----SNSNSTIGTIEG   | GGEIKNC | 33 |
| 08-2  | CTDWKNTNNSNNSS                       | -----NNSNSTIGTIEG   | GGEIKNC | 33 |
| 08-4  | CTDWKPTNNSSSNSSNS                    | -----SSNSSSFNSTIEA  | GGEIKNC | 38 |
| 08-6  | CTDWKNTNNSSHNSS                      | -----SNSNSTIGTIEG   | GGEIKNC | 33 |
| 08-7  | CDDLRTTNT                            | -----SITTEG         | GGEIKNC | 22 |
| 08-8  | CTDWKPTNNSSSNSSNS                    | -----SSNSSSFNSTIEG  | GGEIKNC | 38 |
| 08-9  | CTDWKNTNNSRNNSS                      | -----SNSNSTIGTIEG   | GGEIKNC | 33 |
| 08-10 | CTDWKPTNNSSSNSS                      | -----NSSSFNSTIEG    | GGEIKNC | 34 |
| 08-11 | CTDWKNTNNSNNNTS                      | -----SNSNSTIGTIEG   | GGEIKNC | 33 |
| 08-12 | CTDYTNGNNTNNTSGSI                    | -----TNSTSDIINSTIEG | GGEIKNC | 37 |
| 08-13 | CTDWKPTNNSSSNSSNS                    | -----SSNSSSFNSTIEA  | GGEIKNC | 38 |

a.

|       | 296 |                   | 331          |               |
|-------|-----|-------------------|--------------|---------------|
| HXB2  | ↓   | CTRPNNNTRKRIRIQRC | PGRAFVTIG    | KIGNMROAHC 36 |
| 05-8  |     | CTRPNNNTRKSTP--L  | GLGRAWYTTGQI | IGDIROAHC 35  |
| 05-3  |     | CTRPNNNTRKSTP--L  | GLGRAWYTTGQI | IGDIROAHC 35  |
| 05-4  |     | CTRPNNNTRKSTP--L  | GLGRAWYTTGQI | IGDIROAHC 35  |
| 05-5  |     | CTRPNNNTRKSTP--L  | GLGRAWYTTGQI | IGDIROAHC 35  |
| 05-6  |     | CTRPNNNTRKSTP--L  | GLGRAWYTTGQI | IGDIROAHC 35  |
| 05-9  |     | CTRPNNNTRKSTP--L  | GLGRAWYTTGQI | IGDIROAHC 35  |
| 06-1  |     | CTRPNNNTRKSTH--L  | GPGRAWYATGEI | IGNIROAHC 35  |
| 06-2  |     | CTRPNNNTRKSTH--L  | GPGRAWYATGEI | IGNIROAHC 35  |
| 06-4  |     | CTRPNNNTRKSTH--L  | GPGRAWYATGEI | IGNIROAHC 35  |
| 08-1  |     | CTRPSNNTRKRMT--L  | GPGRVWYTTGQI | IGDIROAHC 35  |
| 08-2  |     | CTRPSNNTRKRMT--L  | GPGRVWYTTGQI | IGDIROAHC 35  |
| 08-4  |     | CTRPGNNTRKRVT--L  | GPGRVWYTTGQI | IGDIRKAYC 35  |
| 08-6  |     | CTRPSNNTRKRMT--L  | GPGRVWYTTGQI | IGDIROAHC 35  |
| 08-7  |     | CTRPNNNTRKSTIS--L | GLGRAWYTTGQI | IGDIROAHC 35  |
| 08-8  |     | CTRPGNNTRKRIT--L  | GPGRVWYTTGQI | IGDIRKAYC 35  |
| 08-9  |     | CTRPSNNTRKRMT--L  | GPGRVWYTTGQI | IGDIROAHC 35  |
| 08-10 |     | CTRPGNNTRKRVT--L  | GPGRVWYTTGQI | IGDIRKAYC 35  |
| 08-11 |     | CTRPSNNTRKRMT--L  | GPGRVWYTTGQI | IGDIROAHC 35  |
| 08-12 |     | CTRPGNNTRKRVT--L  | GPGRVWYTTGQI | IGDIRKAYC 35  |
| 08-13 |     | CTRPGNNTRKRVT--L  | GPGRVWYTTGQI | IGDIRKAYC 35  |

b.

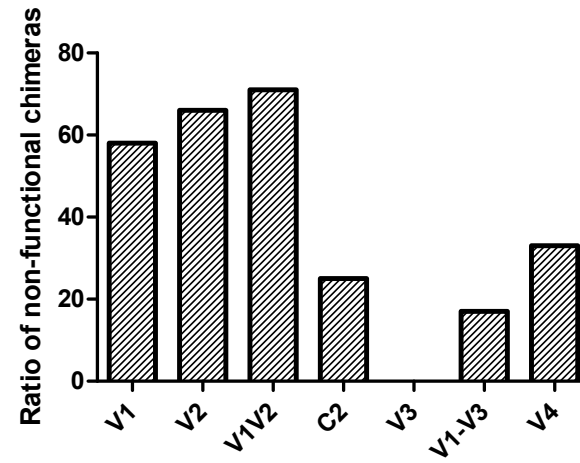

```
HXB2 : MRVKE---KYQHLWRWGWGWTMLLGLMLMICSATEKLWTVVYGVVWKEATTTLFCASDAKAYDTEVHNWVTHACVPTDPNPQE
CON515 : MRVTGIRRNYYQHLW----RWGKRLGLMLMICSAAENLWTVVYGVVWKEATTTLFCASDAKAYDTEVHNWVTHACVPTDPNPQE
CON437 : MRVMGIRKNYQHLW----RWGTMLLGLMLMICSAAENLWTVVYGVVWKEATTTLFCASDAKAYDTEVHNWVTHACVPTDPNPQE
                                     131                V1                157

HXB2 : VVLVNVTFENFMWKNMVEQMHEDIISLWDQSLKPCVKLTPLCVSLKCTDLKNDTNTNS-----SSGRMIMEKGEIKNCSFNIST
CON515 : VVLGNVTFENFDMWKNMVEQMHEDIISLWDQSLKPCVKLTPLCVTLNCTDWKNTNNSNNSNSNSIXSTIEGGEIKNCSFNITTT
CON437 : VVLKKNVTFENFMWKNMVEQMHEDIISLWDQSLKPCVKLTPLCVTLNCTNYNNTSSN-----ASSTIEGEMKNCSEFNVTIT
                                     V2                196

HXB2 : SIRGKVKQKEYAFFYKLDIIPIDNDTTSYKLTSCNTSVITQACPKVSFEPIPIHYCAPAGFAILKCNKTFNGTGPCTNVSTVQCTH
CON515 : SIKTKV--TDHALFYKLDIVPIDNDTTSYRLIXCNTSVITQACPKVSFEPIPIHYCAPAGFAILKCNKTFNGTGPCTNVSTVQCTH
CON437 : SIKTKV--KDYHALFYKLDIVPIDNDTTSYRLIXCNTSVITQACPKVSFEPIPIHYCAPAGFAIKCNKTFNGTGPCTNVSTVQCTH
                                     296                300 306 308                V3                316 319 322                331

HXB2 : GIRPVVSTQLLNGSLAEEVVIRSNFTDNAKTIIVQLNTSVEINCTRPNNTRKRIRIORGPGRAFVTIG-KIGNMRQAHNCNIS
CON515 : GIRPVVSTQLLNGSLAEEVVIRSNFNSNAKTIIVQLNLSVEINCTRPNNTRKRIIT--LGPGRWYFTGQIIGDIRQAHNCNIS
CON437 : GIRPVVSTQLLNGSLAEEVVIRSNFNSNAKTIIVQLNLSVEINCTRPNNTRKRIIT--LGPGRWYFTGQIIGDIRQAHNCNIS
                                     385                389 397*398                V4                406 410*411                418

HXB2 : RAKWNNLTQKIASKLREQFGNNTIIFKQSSGGDPEIVTSHFNCGGEFFYCNSTQLFNSTWFNSTWSTEGSNTEGSDTITLPCRI
CON515 : RAKWNNLTQLITEKLREQFG-NKTIIFKQSSGGDPEIVMHSFNCGGEFFYCNSTQLFNSTWNGNS---TWNDT-TGEDPITLPCRI
CON437 : RAKWNNLTQLITEKLREQFG-NKTIIFKQSSGGDPEIVMHSFNCGGEFFYCNSTQLFNSTWNGNS---TWNDT-TGEDPITLPCRI
                                     460 V5 469
                                     *460

HXB2 : KQIINMWQKVGKAMYAPPISGQIRCSSNITGLLLTRDGGNSNNESEIFRPGGGMDRDNWRSELYKYKVVKIEPLGVAPTKAKRRVV
CON515 : KQIVNMWQEVGKAMYAPPTRGQIRCSSNITGLLLTRDGGNNTNGTETFRPGGGMDRDNWRSELYKYKVVKMEPLGVAPTKAKRRVV
CON437 : KQIVNMWQEVGKAMYAPPISGQIRCSSNITGLLLTRDGGNEINNTETFRPGGGMDRDNWRSELYKYKVVKIEPLGVAPTKAKRRVV
                                     511

HXB2 : QREKRAVGLGALFLGFLGAGSTMGAASMTLTVQARQLLSGIVQQQNNLLRAIEAQQHLLQLTVWGIKQLQARVLAVERYLKDQQ
CON515 : QREKRAVGMTGAMFLGFLGTAGSTMGAASLTLTVQARQLLSGIVQQQNNLLRAIEAQQHLLQLTVWGIKQLQARVLAVERYLKDQQ
CON437 : QREKRAA--LGAMFLGFLGAGSTMGAASITLTVQARQLLSGIVQQQNNLLRAIEAQQHLLQLTVWGIKQLQARVLAVERYLKDQQ

HXB2 : LLGIWGCSGKLICTTAVPWNASWSNKSLEQIWNHTTWMEWDREINNYTSLTHSLIEESQNQOEKNEELLELDKWASLWNWFNITN
CON515 : LLGLWGCSGKLICTTAVPWNASWSNKSLSAIWDNMTWMEWEREIDNYTREIYTLIEESQNQOEKNEELLELDKWASLWNWFNITN
CON437 : LLGIWGCSGKLICTTAVPWNASWSNKSQSEIWDNMTWMEWEREIDNYTSLTHSLIEESQNQOEKNEELLELDKWASLWNWFNITN
                                     *611

HXB2 : WLWYIKLFIMIVGGLVGLRIVFAVLSIVNRVROGYSPLSLOTREPTORGPDRPEGIEEGERDRDRSRLVNGSIALWDDLRLSL
CON515 : WLWYIKLFIMIVGGLIGLRIIVFAVLSIVNRVROGYSPLSLOTREPTORGPDRPEGIEEGERDRDRSRLVNGSIALWDDLRLSL
CON437 : WLWYIKLFIMIVGGLVGLRIIVFAVLSIVNRVROGYSPLSLOTREPTORGPDRPEGIEEGERDRDRSRLVNGSIALWDDLRLSL

HXB2 : CLFSYHLRLDQLLIVIRIVELLGRRGWEALRYWNNLQYWSQELKNSAVSLLNATAIAVAEGTDRVIEVAQRAFAIRNIPRIRIQ
CON515 : CLFSYHLRLDQLLIVIRIVELLGRRGWEALRYWNNLQYWSQELKNSAISLLNATAIAVAEGTDRVIEVAQRAFAIRNIPRIRIQ
CON437 : CLFSYHLRLDQLLIVIRIVELLGRRGWEALRYWNNLQYWSQELKNSAISLLNATAIAVAEGTDRVIEVAQRAFAIRNIPRIRIQ

HXB2 : G E R I L L *
CON515 : G E R I L L *
CON437 : G E R I L L *
```
